# Supplementary material for: Interfacial charge transfer-mediated Fermi level pinning in MBE-grown 2D 2H-MoSe 2 /2H-MoTe 2 heterostructures
Source: Royal Society of Chemistry journal article supplement (doi:10.1039/d5nh00663e), 2025-11-11
Supplement: d5nh00663e1.pdf [file d5nh00663e1.pdf]

## **Supplementary Information**

### **Interfacial charge transfer-mediated Fermi level pinning in MBE-grown 2D 2H-MoSe<sub>2</sub>/2H-MoTe<sub>2</sub> heterostructure**

Kamlesh Bhatt, Santanu Kandar, Lipika, Ashok Kapoor, and Rajendra Singh\*

*Department of Physics, Indian Institute of Technology Delhi, Hauz Khas, New Delhi 110016, India.*

*\*E-mail: [rsingh@physics.iitd.ac.in](mailto:rsingh@physics.iitd.ac.in)*

**Fig. S1**

Raman mapping has been performed over a  $20 \times 20 \mu\text{m}^2$  area across the lateral edge of the  $\text{MoSe}_2/\text{MoTe}_2$  heterostructure to confirm phase uniformity. The two-dimensional intensity maps of the characteristic Raman modes for  $\text{MoSe}_2$  and  $\text{MoTe}_2$  are presented in Fig. a, b. The Raman maps show uniform intensity distribution across the right side of the edge for  $\text{MoSe}_2$ , and across the entire region for the underlying  $\text{MoTe}_2$ , confirming consistent phase uniformity. Minor variations observed in some regions for  $\text{MoTe}_2$  are likely due to overcorrection of the background during batch plotting, since the Raman signal of  $\text{MoTe}_2$  is much weaker than that of  $\text{MoSe}_2$ , and also both lie at a small energy difference. To further confirm large-area phase uniformity, we also acquired Raman spectra from multiple locations across the heterostructure (Fig.c), all of which consistently show the presence of the 2H phase of  $\text{MoTe}_2$  and  $\text{MoSe}_2$  at the respective probed locations (Fig. d).

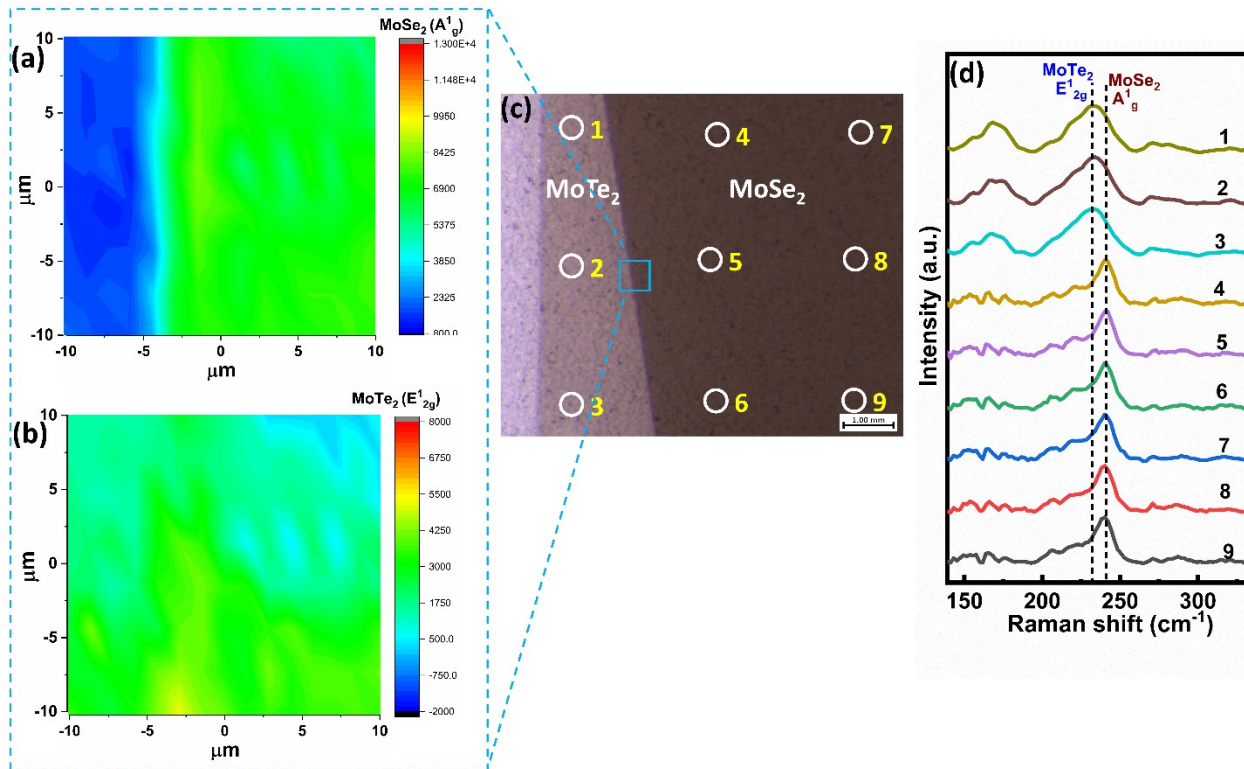

**Fig. S1** Raman mapping and spectra of the MoSe<sub>2</sub>/MoTe<sub>2</sub> heterostructure. (a) Raman intensity map of the MoSe<sub>2</sub> A<sub>g</sub><sup>1</sup> mode, and (b) the MoTe<sub>2</sub> E<sub>2g</sub><sup>1</sup> mode. (c) Optical microscope image of the heterostructure with marked positions corresponding to approximate Raman spectra acquisition points across the heterostructure. (d) Raman spectra recorded at the marked positions, showing the characteristic peaks of MoTe<sub>2</sub> and MoSe<sub>2</sub>.

**Fig. S2**

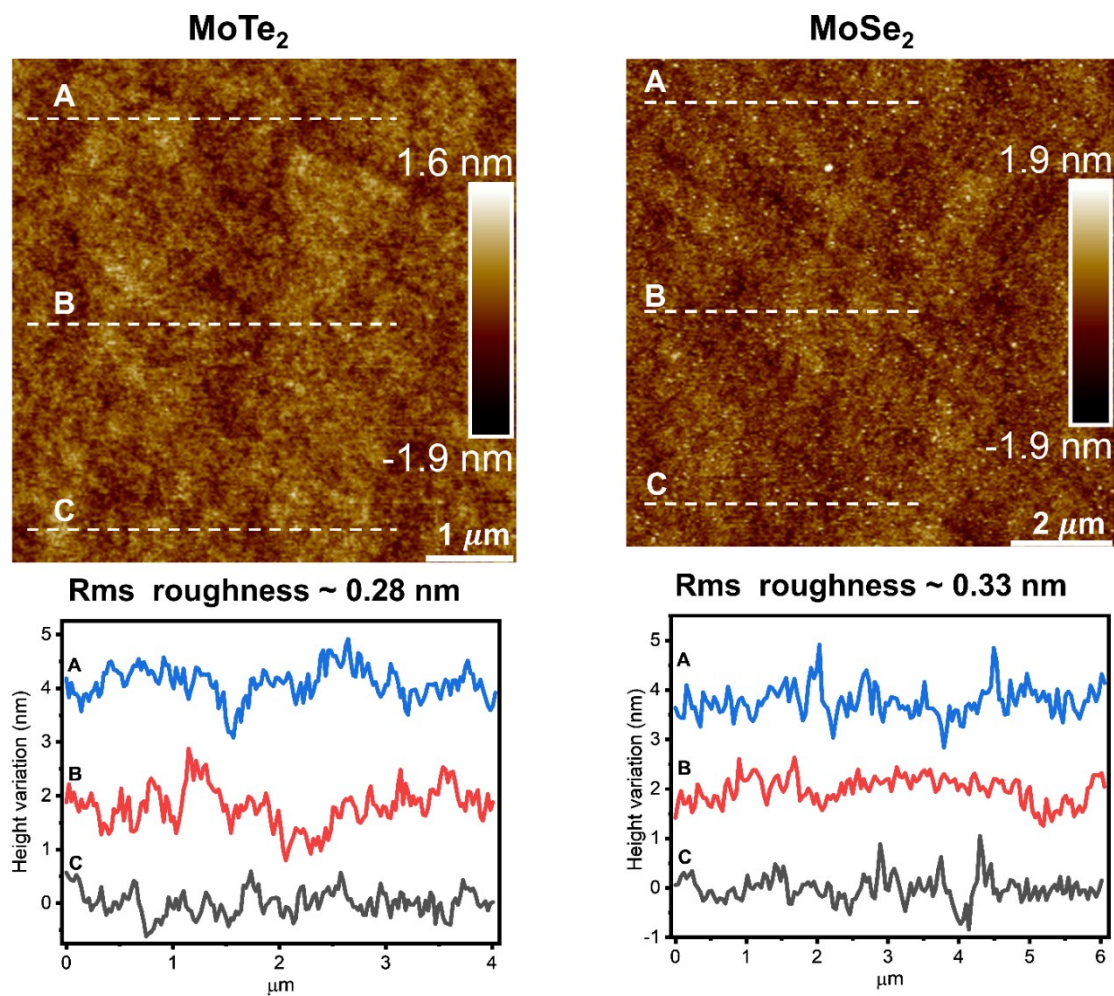

**Fig. S2** AFM images of MoTe<sub>2</sub> and MoSe<sub>2</sub>, with multiple line profiles across the surface, reflecting smooth film surfaces with low surface roughnesses of 0.28 nm and 0.33 nm, respectively.

**Fig. S3**

The precise value of the valence band edge is calculated by fitting the VB edge using the Edge down function in the casaXPS software. The Edge down function gives a more accurate result than simple linear extrapolation, as it models the band edge onset using a complementary error function, which is the convolution of the intrinsic step edge and the Gaussian broadening around the edge. The Edge down fitting graphs from casaXPS are also included in this figure.

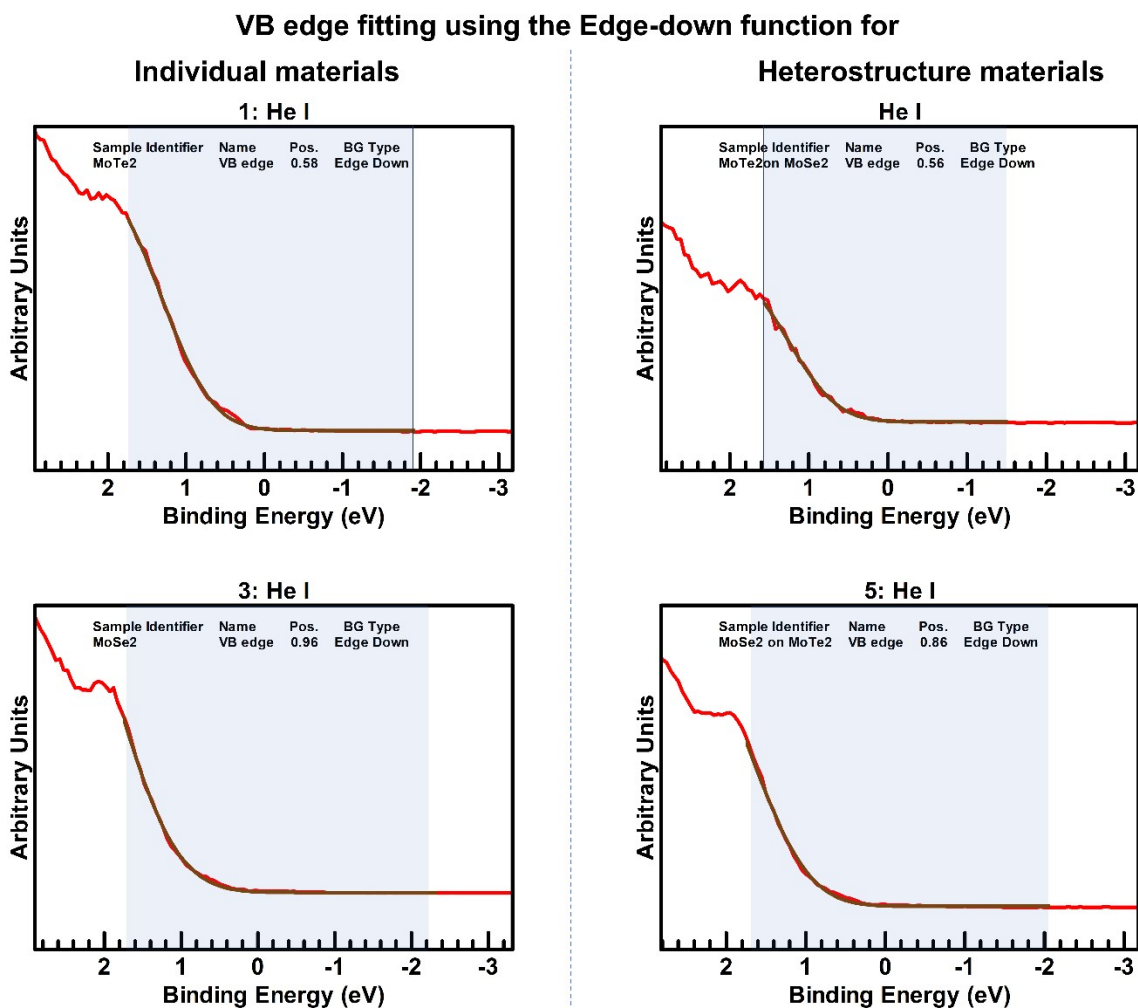

**Fig. S3** The UPS spectra for individual materials, MoTe<sub>2</sub>, MoSe<sub>2</sub> and for heterostructures are presented from the casaXPS interface. The graphs show the fitting of the valence band edge using the Edge down function for calculating the position of the band edge, where the shaded region corresponds to the fitted region of the spectrum.

**Fig. S4**

The AR-XPS performed at  $60^\circ$  emission angle (Fig. S4a) shows that the relative contribution from different bonding states of Mo, Te and Se does not show any significant variation in comparison to that for the normal emission, as shown in Fig. 5c. For  $20^\circ$  emission angle, the collected signal is very weak at such a small emission angle with a poor resolution of the recorded spectra; hence the spectral fitting lacks reliability and we avoid drawing any conclusions based on this.

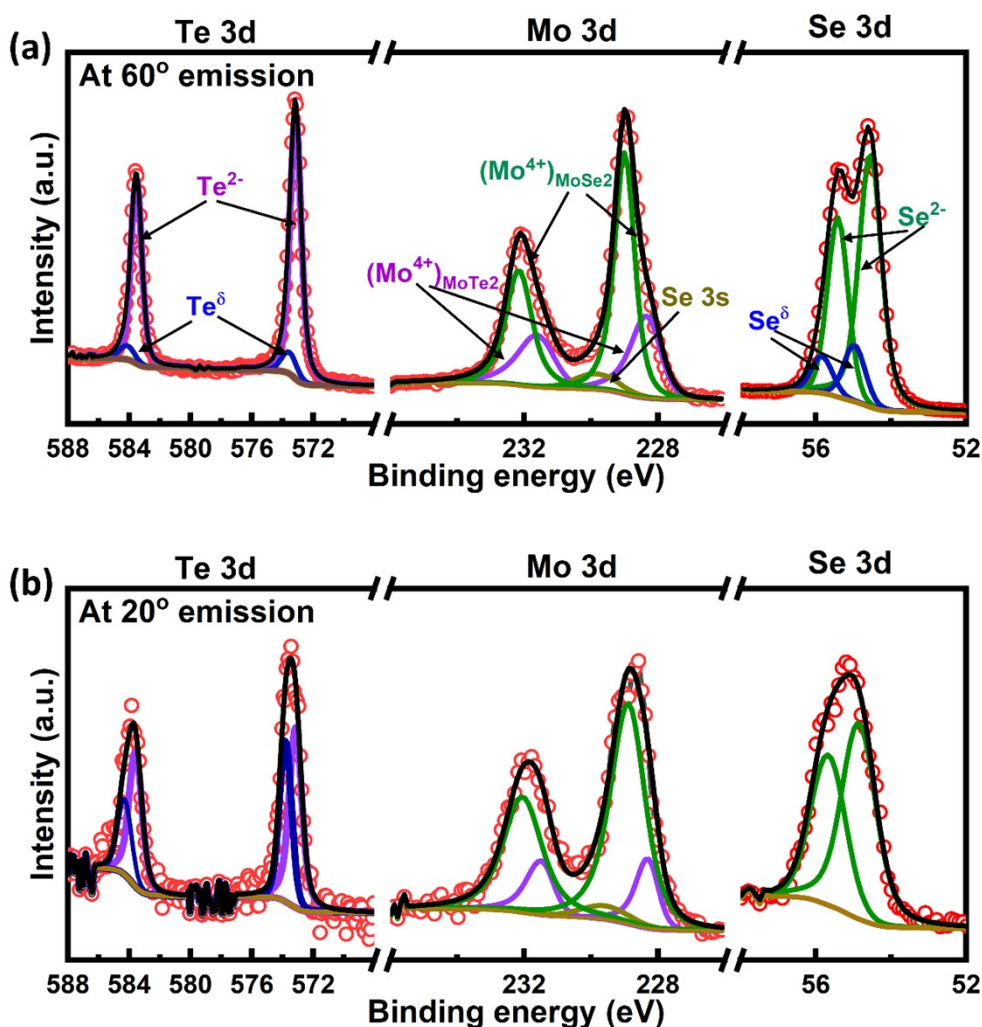

**Fig. S4** AR-XPS core level spectra of Te 3d, Mo 3d and Se 3d, taken at (a)  $60^\circ$  emission angle, and (b)  $20^\circ$  emission angle

**Fig. S5**

The density functional theory (DFT) calculations are carried out to simulate Te-vacancy defect states in  $\text{MoTe}_2$ . Figure shows the resulting density of states (DOS) spectra for  $\text{MoTe}_2$  with and without Te vacancy. The DOS spectra shows that Te vacancies in  $\text{MoTe}_2$  introduce prominent localized states just below the conduction band minimum.

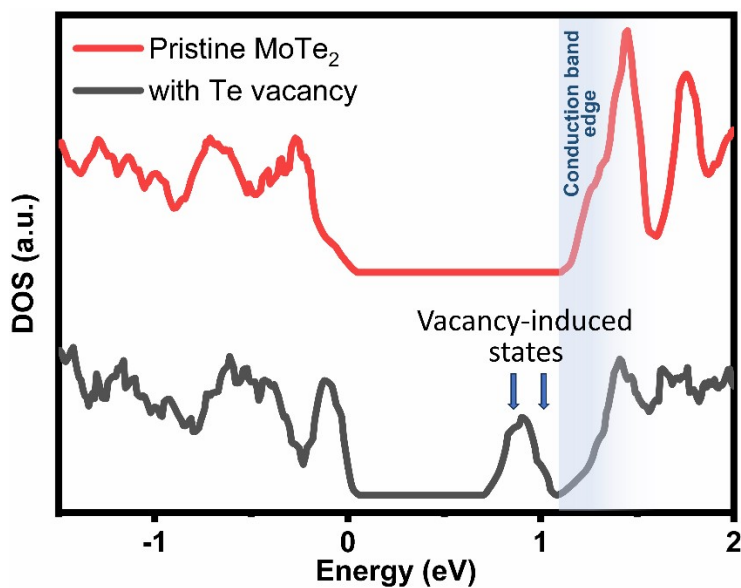

**Fig. S5** Density of states (DOS) spectra of pristine  $\text{MoTe}_2$  (red) and  $\text{MoTe}_2$  with Te vacancies (black). The presence of Te vacancies induces localized defect states just below the conduction band minimum.

### **Table S1**

To support these observations and quantify the thermodynamic favorability of Te vacancy formation, we calculated vacancy formation energies for Te and Mo in MoTe<sub>2</sub> and for Se vacancy in MoSe<sub>2</sub> using DFT. The vacancy formation energy (for example, for Te vacancy) was obtained using the relation:

$$E_f(V_{Te}) = E(\text{total with } V_{Te}) - E(\text{total for pristine}) + \mu_{Te}$$

where  $E(\text{total with } V_{Te})$  is the total energy of the supercell containing the vacancy,  $E(\text{total for pristine})$  is the energy of the pristine supercell without any vacancy and  $\mu_{Te}$  is the chemical potential of the removed atom (here Te). The calculations reveal that Te vacancies are the favorable intrinsic defect in MoTe<sub>2</sub>, having a lower vacancy formation energy than that for Mo vacancies.

**Table S1.** Vacancy formation energies of Te and Mo in MoTe<sub>2</sub>, and Se vacancies in MoSe<sub>2</sub>, calculated using DFT under atomic rich conditions.

| <b>Vacancy type</b>                                                    | <b>Te vacancy</b> | <b>Mo vacancy</b> | <b>Se vacancy</b> |
|------------------------------------------------------------------------|-------------------|-------------------|-------------------|
| E (total for pristine) <sub>MoTe<sub>2</sub> or MoSe<sub>2</sub></sub> | – 303.24 eV       | – 303.24 eV       | – 333.10 eV       |
| E (total with vacancy)                                                 | – 297.16 eV       | – 288.90 eV       | – 326.28 eV       |
| Chemical potential per atom ( $\mu_{Te}$ or $\mu_{Mo}$ or $\mu_{Se}$ ) | – 3.44 eV         | – 11.45 eV        | – 3.72 eV         |
| Formation energy ( $E_f$ )                                             | 2.64 eV           | 2.89 eV           | 3.10 eV           |

### **Table S2**

**Table S2.** XPS peak fitting parameters of different deconvoluted components for individual materials MoTe<sub>2</sub>, MoSe<sub>2</sub> and MoSe<sub>2</sub>/MoTe<sub>2</sub> heterostructure.

| Material                                 | Core level | Bonding elements | Component                  | Line shape       | Binding Energy (eV) | FWHM (eV) | Peak area (CPS <sub>SeV</sub> ) |
|------------------------------------------|------------|------------------|----------------------------|------------------|---------------------|-----------|---------------------------------|
| <b>MoTe<sub>2</sub></b>                  | Mo 3d      | Mo-Te            | 3d 5/2 (Mo <sup>4+</sup> ) | LA(1.3,2.44,69)  | 228.32              | 0.66      | 2254                            |
|                                          |            | Mo-Te            | 3d 3/2 (Mo <sup>4+</sup> ) | LA(1.3,2.44,69)  | 231.51              | 0.91      | 1634                            |
|                                          | Te 3d      | Mo-Te            | 3d 5/2 (Te <sup>2-</sup> ) | LA(85)           | 573.15              | 0.87      | 12884                           |
|                                          |            | Mo-Te            | 3d 3/2 (Te <sup>2-</sup> ) | LA(80)           | 583.52              | 0.87      | 8257                            |
| <b>MoSe<sub>2</sub></b>                  | Mo 3d      | Mo-Se            | 3d 5/2 (Mo <sup>4+</sup> ) | LA(1.33,1.55,69) | 229.06              | 0.65      | 5478                            |
|                                          |            | Mo-Se            | 3d 3/2 (Mo <sup>4+</sup> ) | LA(1.33,1.25,69) | 232.21              | 0.89      | 3747                            |
|                                          | Se 3s      | Mo-Se            | 3s                         | LA(50)           | 230.10              | 1.75      | 718                             |
|                                          | Se 3d      | Mo-Se            | 3d 5/2 (Se <sup>2-</sup> ) | LA(80)           | 54.73               | 0.66      | 2920                            |
|                                          |            | Mo-Se            | 3d 3/2 (Se <sup>2-</sup> ) | LA(10)           | 55.58               | 0.72      | 1815                            |
| <b>MoSe<sub>2</sub>/MoTe<sub>2</sub></b> | Mo 3d      | Mo-Te            | 3d 5/2 (Mo <sup>4+</sup> ) | LA(1.3,2.44,69)  | 228.27              | 0.92      | 4540                            |
|                                          |            | Mo-Te            | 3d 3/2 (Mo <sup>4+</sup> ) | LA(1.3,2.44,69)  | 231.44              | 1.18      | 2853                            |
|                                          |            | Mo-Se            | 3d 5/2 (Mo <sup>6+</sup> ) | LA(1.33,1.55,69) | 229.18              | 0.62      | 6557                            |
|                                          |            | Mo-Se            | 3d 3/2 (Mo <sup>6+</sup> ) | LA(1.33,1.25,69) | 232.32              | 0.84      | 4680                            |
|                                          | Se 3s      | Mo-Se            | 3s                         | LA(50)           | 230.05              | 1.18      | 1226                            |
|                                          | Te 3d      | Mo-Te            | 3d 5/2 (Te <sup>2-</sup> ) | LA(85)           | 573.14              | 0.94      | 24702                           |
|                                          |            | Mo-Te            | 3d 3/2 (Te <sup>2-</sup> ) | LA(80)           | 573.53              | 0.92      | 16056                           |
|                                          |            | Te-Se            | 3d 5/2 (Te <sup>δ</sup> )  | LA(50)           | 573.46              | 0.95      | 2104                            |
|                                          |            | Te-Se            | 3d 3/2 (Te <sup>δ</sup> )  | LA(50)           | 583.86              | 0.73      | 1244                            |
|                                          | Se 3d      | Mo-Se            | 3d 5/2 (Te <sup>2-</sup> ) | LA(80)           | 54.85               | 0.69      | 3324                            |
|                                          |            | Mo-Se            | 3d 3/2 (Te <sup>2-</sup> ) | LA(10)           | 55.68               | 0.86      | 2405                            |
|                                          |            | Te-Se            | 3d 5/2 (Se <sup>δ</sup> )  | LA(50)           | 55.27               | 0.90      | 896                             |
|                                          |            | Te-Se            | 3d 3/2 (Se <sup>δ</sup> )  | LA(50)           | 55.99               | 0.70      | 569                             |

### Calculation S1

**Calculation of film stoichiometry using the relative sensitivity factor (RSF)-corrected peak areas.**

The stoichiometry of the MoTe<sub>2</sub>,

$$\text{Mo:Te} = \frac{\text{Effective peak area of the (Mo - Te) component in Mo 3d}}{\text{Effective peak area of the (Mo - Te) component in Te 3d}}$$
$$\text{Mo:Te} = \frac{\text{Raw peak area of the (Mo - Te) component in Mo 3d} / \text{RSF value for Mo 3d}}{\text{Raw peak area of the (Mo - Te) component in Te 3d} / \text{RSF value for Te 3d}}$$

For example,

Under normal emission, the Mo:Te ratio in the MoSe<sub>2</sub>/MoTe<sub>2</sub> heterostructure (using Table S2 values),

$$\text{Mo:Te} = \frac{4550 / 3.32}{24702 / 9.51} = \frac{1367}{2597} = 1:1.90$$

Similarly, the relative percentage ratio of two different bonding states in a core level, for example, from the Te 3d spectrum in the heterostructure,

$$\text{Te}^{\delta}/\text{Te}^{2-} \% = \frac{2104 / 9.51}{24702 / 9.51} \times 100 \% = 8.51 \%$$
